# Supplementary material for: Unlocking Aspirin's Chemopreventive Activity: Role of Irreversibly Inhibiting Platelet Cyclooxygenase-1
Source: Oxford University Press journal article supplement (doi:10.1158/1940-6207.capr-16-0241), 2016-12-20
Supplement: 19406207capr160241-sup-171871_2_supp_3762404_khf3wk.docx [file 19406207capr160241-sup-171871_2_supp_3762404_khf3wk.docx]

**Supplementary Data**

**Supplementary Figures - Figure S1**. Aspirin and Aspirin-PC does not block the release of TGF from platelets following co-culture with colon cancer cells. Measurable amounts of TGFβ1 were detected in the medium when mouse (A) and human (B) platelets were co-cultured with MC-26 (A) and Caco-2 (B) cells, respectively. However the levels of platelet-derived TGFβ1 in the culture medium were not affected by either of the aspirin test drugs**.** Values in each group were calculated from triplicates of 3 separate studies. **Figure S2.** Aspirin and Aspirin-PC block platelet induced upregulation of the EMT marker SNAIL in MC-26 cells. Co-culture of platelets with MC-26 cells resulted in an increase in Snail mRNA expression, which was dose-dependently inhibited by both aspirin and Aspirin-PC**.** MC-26 cells were co-cultured in the presence of mouse platelets with or without the test drugs. Values are the pooled average of two separate samples per group. **Figure S3.** Aspirin and Aspirin-PC decrease collagen-induced activation of platelets obtained from the AOM/DSS cancer model.P-selectin flow cytometry was performed on platelet rich plasma (PRP) from mice untreated (control, n=6), or treated with AOM/3% DSS plus saline (n=5), aspirin (n=14) or Aspirin-PC (n=11). PRP was treated with 2.5 microgram/ml of collagen or was untreated (basal) and samples were subjected to P-selectin staining followed with flow cytometry. **Figure S4.** Time course of aspirin (ASA) test drugs on body weight in AOM/DSS mouse colon cancer model. The animal body weight in grams was measured weekly starting at the beginning of Week 1. At Weeks 2, 5, and 8, regular drinking water was replaced with 3% DSS water. Control (n=6), AOM/DSS+Saline (n=5), AOM/DSS+aspirin (n=14), AOM/DSS+Aspirin-PC (n=11). **Figure S5.** Aspirin and Aspirin-PC do not alter changes in body weight induced by AOM/DSS.The animal body weight was measured at the end of the study and the average body weight between groups was analyzed. Control (n=6), AOM/DSS+Saline (n=5), AOM/DSS+aspirin (n=14), AOM/DSS+Aspirin-PC (n=11). **Figure S6.** Effect of aspirin (ASA) test drugs on fecal hemoglobin in AOM/DSS mouse cancer model.Representative fecal samples were collected weekly and analyzed for hemoglobin content. Control (n=6), AOM/DSS+Saline (n=5), AOM/DSS +aspirin (n=14), AOM/DSS+Aspirin-PC (n=11). **Figure S7.** Effect of aspirin (ASA) test drugs on hematocrit in AOM/DSS mouse cancer model. At the end of the study, the animal blood was collected and hematocrit was measured and the average hematocrit between groups was analyzed. Control (n=6), AOM/DSS+Saline (n=5), AOM/DSS +aspirin (n=14), AOM/DSS+Aspirin-PC (n=11). No significant difference was found between any groups.
